# Supplementary material for: Transmissibility of Hand, Foot, and Mouth Disease in 97 Counties of Jiangsu Province, China, 2015- 2020
Source: Research Square preprint supplement (doi:10.21203/rs.3.rs-752604/v1), 2021-07-30
Supplement: Supplementary file 1 [file dddb3aab81f4c6a602056598.docx]

**Table S1 Fitting results of 97 regions in Jiangsu Province**

| Region | City | County | *R2* | *P* |
| --- | --- | --- | --- | --- |
| Southern Jiangsu | Changzhou | Jintang | 0.478 | 0.000 |
| Suyang | 0.416 | 0.000 |
| Tianning | 0.240 | 0.000 |
| Wujin | 0.605 | 0.000 |
| Xinbei | 0.337 | 0.000 |
| Zhonglou | 0.223 | 0.000 |
| Nanjing | Gaochun | 0.733 | 0.000 |
| Gulou | 0.611 | 0.000 |
| Jianye | 0.502 | 0.000 |
| Jiangning | 0.651 | 0.000 |
| Liuhe | 0.581 | 0.000 |
| Pukou | 0.579 | 0.000 |
| Qixia | 0.590 | 0.000 |
| Qinhuai | 0.521 | 0.000 |
| Sushui | 0.537 | 0.000 |
| Xuanwu | 0.499 | 0.000 |
| Yuhuatai | 0.538 | 0.000 |
| Suzhou | Changshu | 0.652 | 0.000 |
| Gongyeyuan | 0.627 | 0.000 |
| Gusu | 0.492 | 0.000 |
| Huqiu | 0.435 | 0.000 |
| Kunshan | 0.516 | 0.000 |
| Taichng | 0.495 | 0.000 |
| Wujiang | 0.532 | 0.000 |
| Wuzhong | 0.541 | 0.000 |
| Xiangcheng | 0.498 | 0.000 |
| Zhangjiagang | 0.543 | 0.000 |
| Wuxi | Binhu | 0.616 | 0.000 |
| Huishan | 0.616 | 0.000 |
| Jiangyin | 0.816 | 0.000 |
| Liangxi | 0.595 | 0.000 |
| Xishan | 0.567 | 0.000 |
| Xin | 0.621 | 0.000 |
| Yixing | 0.480 | 0.000 |
| Zhenjiang | Dantu | 0.441 | 0.000 |
| Danyang | 0.581 | 0.000 |
| Jingkou | 0.511 | 0.000 |
| Jurong | 0.502 | 0.000 |
| Runzhou | 0.414 | 0.000 |
| Yangzhong | 0.519 | 0.000 |
| Northern  Jiangsu | Huaian | Huaian | 0.577 | 0.000 |
| Huaiyin | 0.575 | 0.000 |
| Jinhu | 0.508 | 0.000 |
| Kafaqu | 0.515 | 0.000 |
| Lianshui | 0.406 | 0.000 |
| Qingjiangpu | 0.645 | 0.000 |
| Xuyi | 0.568 | 0.000 |
| Lianyun | Donghai | 0.436 | 0.000 |
| Ganyu | 0.422 | 0.000 |
| Guannan | 0.590 | 0.000 |
| Guanyun | 0.379 | 0.000 |
| Haizhou | 0.505 | 0.000 |
| Lianyungang | 0.573 | 0.000 |
| Suqian | Muyang | 0.528 | 0.000 |
| Siyang | 0.348 | 0.000 |
| Sihong | 0.582 | 0.000 |
| Sucheng | 0.729 | 0.000 |
| Suyu | 0.673 | 0.000 |
| Yancheng | Binhai | 0.467 | 0.000 |
| Dafeng | 0.410 | 0.000 |
| Dongtai | 0.412 | 0.000 |
| Funing | 0.392 | 0.000 |
| Jianhu | 0.300 | 0.000 |
| Sheyang | 0.146 | 0.000 |
| Tinghu | 0.606 | 0.000 |
| Xiangshui | 0.229 | 0.000 |
| Yandu | 0.586 | 0.000 |
| Xuzhou | Fengxian | 0.377 | 0.000 |
| Gulou | 0.187 | 0.000 |
| Jiawang | 0.094 | 0.000 |
| Peixian | 0.535 | 0.000 |
| Pizhou | 0.432 | 0.000 |
| Quanshan | 0.122 | 0.000 |
| Suining | 0.150 | 0.000 |
| Tongshan | 0.227 | 0.000 |
| Xinyi | 0.296 | 0.000 |
| Yunlong | 0.198 | 0.000 |
| Central Jiangsu | Nantong | Chongchun | 0.787 | 0.000 |
| Gangzha | 0.792 | 0.000 |
| Haian | 0.446 | 0.000 |
| Haimen | 0.598 | 0.000 |
| Qidong | 0.720 | 0.000 |
| Rudong | 0.675 | 0.000 |
| Rugao | 0.496 | 0.000 |
| Tongzhou | 0.716 | 0.000 |
| Taizhou | Gaogang | 0.567 | 0.000 |
| Hailing | 0.557 | 0.000 |
| Jiangyan | 0.646 | 0.000 |
| Jingjiang | 0.806 | 0.000 |
| Taixing | 0.786 | 0.000 |
| Xinghua | 0.443 | 0.000 |
| Yangzhou | Baoying | 0.503 | 0.000 |
| Gaoyou | 0.461 | 0.000 |
| Guangling | 0.465 | 0.000 |
| Hanjiang | 0.614 | 0.000 |
| Jiangdu | 0.446 | 0.000 |
| Yizheng | 0.640 | 0.000 |
